# Supplementary material for: A superparaelectric design with structure optimization enables superior energy-storage performances and stabilities in (Na0.5Bi0.5)TiO3-based ceramics
Source: Royal Society of Chemistry journal article supplement (doi:10.1039/d5qi00216h), 2025-01-01
Supplement: d5qi00216h1.pdf [file d5qi00216h1.pdf]

## Supplementary Material

### **A superparaelectric design with structure optimization enables superior energy-storage performances and stabilities in $(\text{Na}_{0.5}\text{Bi}_{0.5})\text{TiO}_3$ -based ceramics**

Xiangjun Meng<sup>a,b</sup>, Ying Yuan<sup>a,b\*</sup>, Bin Tang<sup>a,b</sup>, Enzhu Li<sup>a,b</sup>

*a-National Engineering Research Center of Electromagnetic Radiation Control Materials, University of Electronic Science and Technology of China, Chengdu, Sichuan 610054, China*

*b-State Key Laboratory of Electronic Thin Films and Integrated Devices, University of Electronic Science and Technology of China, Chengdu, Sichuan 610054, China*

**Corresponding author:** Ying Yuan; E-mail: [yingyuan@uestc.edu.cn](mailto:yingyuan@uestc.edu.cn)

## 1. Experimental section

**Fabrication:** High-purity ( $> 98\%$ )  $\text{Na}_2\text{CO}_3$ ,  $\text{Bi}_2\text{O}_3$ ,  $\text{SrCO}_3$ ,  $\text{CaCO}_3$ ,  $\text{Ta}_2\text{O}_5$ , and  $\text{TiO}_2$  powders were selected as raw materials to synthesize  $(1-x)\text{NBST}-x\text{CTT}$  ( $x = 0.0, 0.1, 0.2, 0.3$ , and  $0.4$ ) SPE-RFE ceramics. More specifically, the mixture of these powders was wet-milled stoichiometrically with zirconia balls in alcohol for 6~18 h and then dried at 80~100 °C for 3~6 h. Subsequently, the dried mixture was calcined at 800~1000 °C for 2~6 h and re-milled for 6~18 h to synthesize  $(1-x)\text{NBST}-x\text{CTT}$  powder. Then, the mixture of  $(1-x)\text{NBST}-x\text{CTT}$  powder with 40~50 wt.% solvent (toluene/ethanol), 0.6~1.5 wt.% dispersant (phosphate ester/glycerol trioleate), 2~3 wt.% plasticizer (polyethylene glycol/benzyl butyl phthalate), and 4~6 wt.% binder (Polyvinyl butyral) was milled to obtain a homogeneous slurry to fabricate the corresponding green tapes by a tape-casting method. After drying, the  $(1-x)\text{NBST}-x\text{CTT}$  green tapes were cut into the desired shape and laminated at 10~30 MPa at 50~80°C for green samples. Finally, the  $(1-x)\text{NBST}-x\text{CTT}$  SPE-RFE ceramics were prepared by burning the binder and sintering at 1150~1250°C for 2~5 hours in a sealed box furnace.

**Characterization:** The microstructure of  $(1-x)\text{NBST}-x\text{CTT}$  SPE-RFE ceramics was detected by a scanning electron microscope (SEM, Phenom ProX, Phenom-World). The phase structures were analyzed using an X-ray diffractometer (XRD, PANalytical, X' Pert<sup>3</sup> Powder), and the GSAS–EXPGUI program carried out the refinement process. The select area electron diffraction (SAED) patterns, high-resolution (HR) images, and bright-field (BF) micrographs were obtained using transmission electron microscopy (TEM, FEI Tecnai G2 F30 STWIN, USA). A precision LCR meter (Agilent, E4980A) with a temperature controller measured the dielectric properties and complex impedance spectra. The electric breakdown strength was evaluated by a withstand voltage

tester (Meiruike, RK2671A) under a DC voltage mode, and COMSOL Multiphysics simulated the breakdown behavior inside the ceramic. The polarization–electric field ( $P$ – $E$ ) hysteresis loops were obtained by a ferroelectric tester (Premier II, Radiant Technologies Inc., USA). The charge-discharge properties were characterized by a pulsed charge-discharge platform (CFD-003, Tongguo Technology).

## 2. Results and discussion

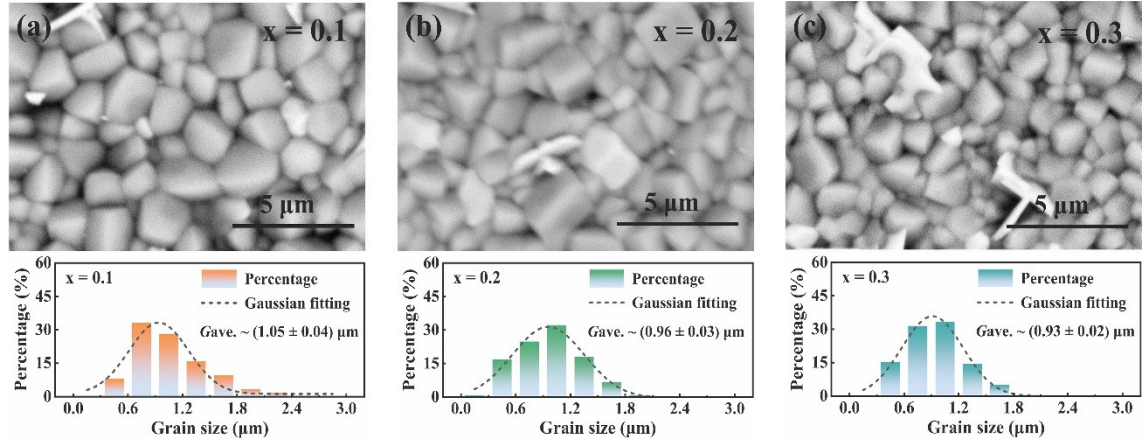

**Fig. S1** (a-c) SEM images and grain size distributions of  $(1-x)\text{NBST}-x\text{CTT}$  ceramics.

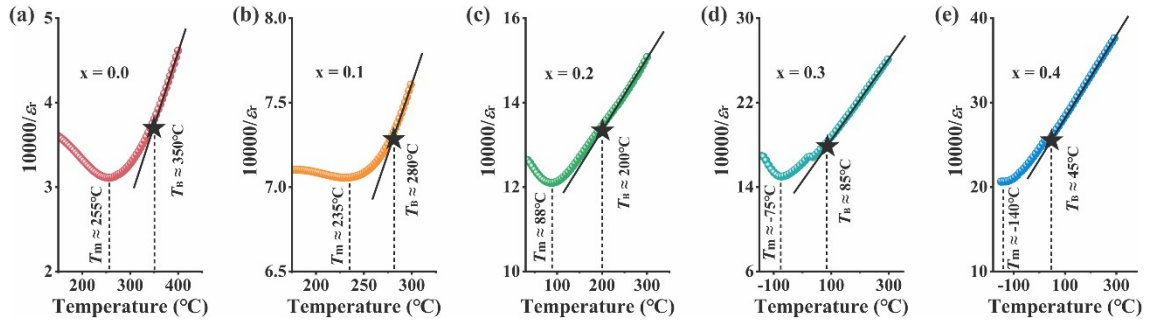

**Fig. S2** (a-e) The  $1/\epsilon_r$  versus temperature curves of  $(1-x)\text{NBST}-x\text{CTT}$  ceramics.

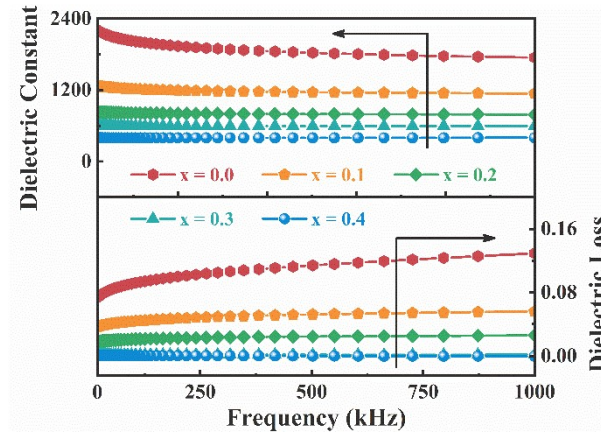

**Fig. S3** (a) The frequency-dependent  $\epsilon_r$  and  $\tan\delta$  of  $(1-x)\text{NBST}-x\text{CTT}$  ceramics.

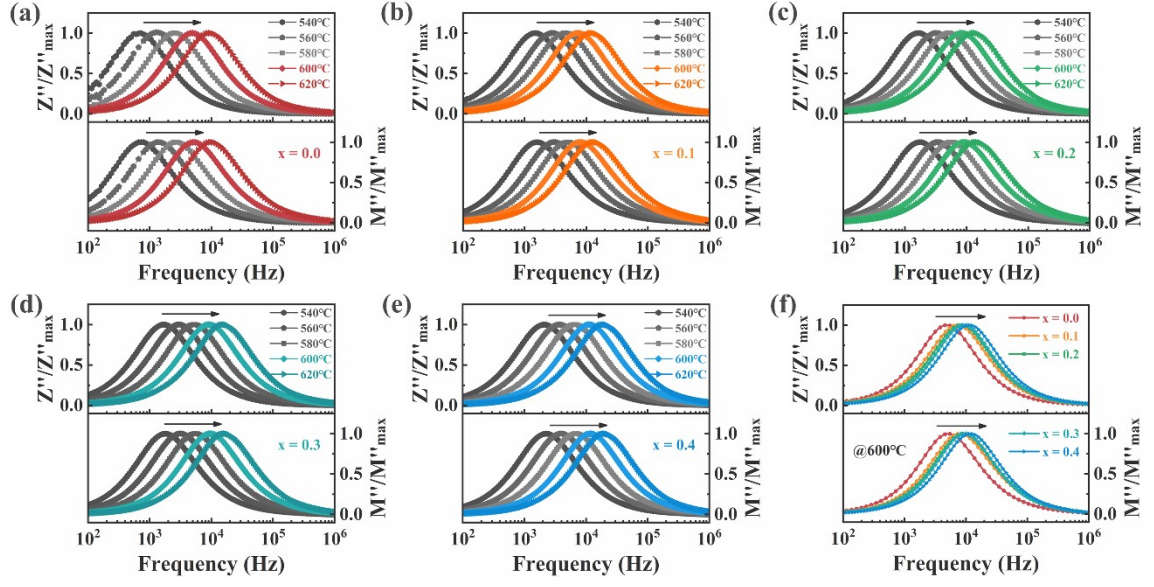

**Fig. S4** (a-f) The normalized  $Z''$  and  $M''$  versus frequency at various temperatures for  $(1-x)\text{NBST}-x\text{CTT}$  ceramics.

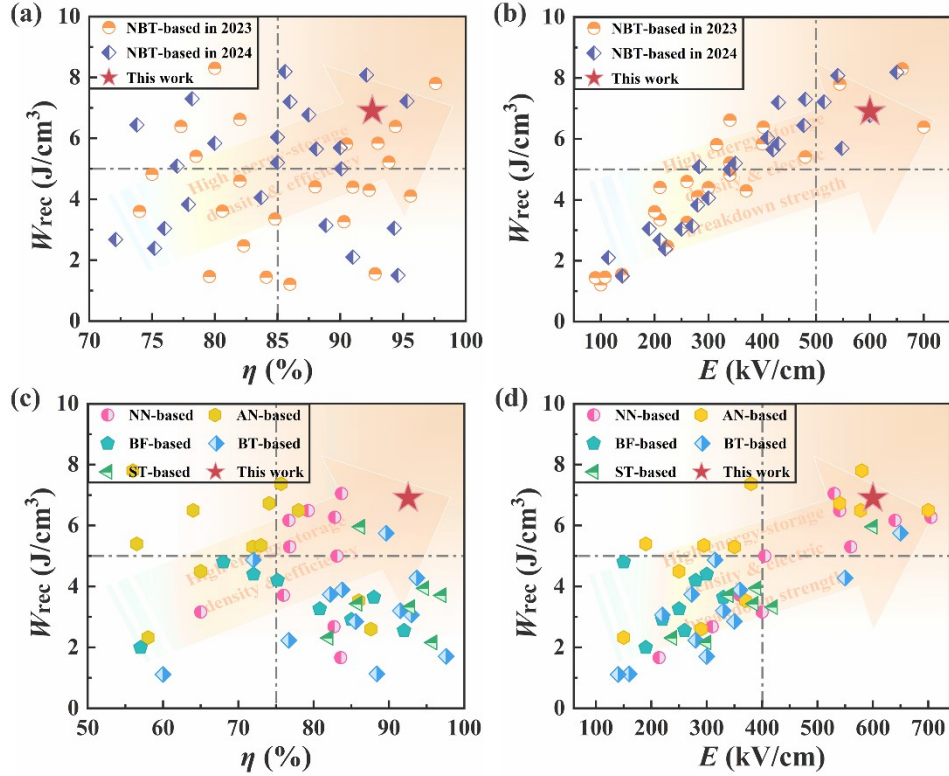

**Fig. S5** Comparison of ESPs for  $0.6\text{NBST}-0.4\text{CTT}$  in this work with other NBT-based (a-b)<sup>1-47</sup> and other lead-free (c-d)<sup>48-96</sup> ceramics.

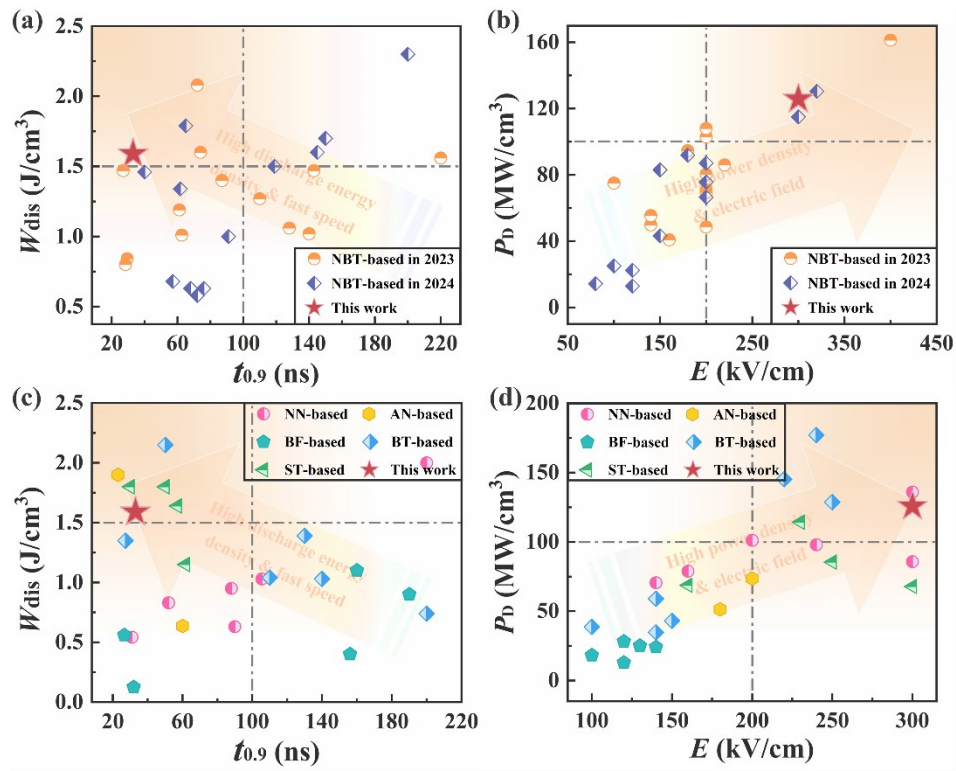

**Fig. S6** (a-f) Comparison of CDPs for 0.6NBST-0.4CTT in this work with other NBT-based (a-b)<sup>1, 2, 4, 7, 8, 10, 11, 18-21, 23, 24, 27, 29, 30, 32, 33, 38-40, 42, 44, 45, 47</sup> and other lead-free (c-d)<sup>49-52, 54-56, 61, 63, 69, 73-80, 83, 85-87, 92-96</sup> ceramics.

**Table S1** The fitted resistances of (1-x)NBST-xCTT ceramics at various temperatures.

|       | $x = 0.0$           | $x = 0.1$           | $x = 0.2$           | $x = 0.3$           | $x = 0.4$           |
|-------|---------------------|---------------------|---------------------|---------------------|---------------------|
|       | $R_b$ (k $\Omega$ ) |
| 540°C | 207.8               | 232.7               | 304.1               | 439.4               | 488.6               |
| 560°C | 116.2               | 131.8               | 166.0               | 256.4               | 283.0               |
| 580°C | 63.8                | 83.3                | 105.4               | 148.7               | 163.9               |
| 600°C | 35.2                | 54.4                | 65.6                | 88.0                | 96.1                |
| 620°C | 19.7                | 34.5                | 45.1                | 53.3                | 57.7                |

## References

1. R. K. Zhao, Y. S. Zhang, W. H. Li, X. G. Tang, K. Y. Wang, J. Hu, Z. H. Shen, H. X. Fan, Y. P. Jiang and X. B. Guo, Energy storage and charge/discharge performance of Sm-doped NBT-based lead-free ceramics, *ACS Appl. Electron. Mater.*, 2023, **5**, 6104-6113.
2. W. J. Cao, L. Li, H. Y. Zhao, C. Y. Wang, C. Liang, F. Li, X. C. Huang and C. C. Wang, Outstanding energy storage performance of NBT-based ceramics under moderate electric field achieved via antiferroelectric engineering, *ACS Appl. Mater. Interfaces*, 2023, **15**, 38633-38643.
3. Z. M. Cai, H. Yang, C. Q. Zhu, S. H. Li, B. C. Luo, A. Y. Li, X. H. Li, Z. B. Tian and P. Z. Feng, Local heterogeneous polarization enhanced superior low-field energy storage performance in lead-free relaxor ferroelectric ceramics, *ACS Sustainable Chem. Eng.*, 2023, **11**, 13729-13735.
4. C. Bin, X. Hou, L. Liao, Y. Liu, H. Yang, Y. Liu and J. Wang, Improved energy storage performance in rare-earth modified lead-free BNT-based relaxor ferroelectric ceramics, *Appl. Phys. Lett.*, 2023, **123**, 012901.
5. F. K. Chen, K. Zhao, X. T. Jiang, X. Y. Zeng, J. Dong, K. Yu, C. L. Song, Y. Yan, L. Jin and D. Zhang, Improved dielectric energy storage performance of  $\text{Na}_{0.5}\text{Bi}_{0.5}\text{TiO}_3$ -based lead-free relaxation ferroelectric ceramics achieved by domain structural regulation and enhanced densification, *Ceram. Int.*, 2023, **49**, 31152-31162.
6. Y. H. Chen, L. P. Yang, D. Zhao, Y. S. Wang, Q. J. Zheng, X. M. He and D. M. Lin, Enhanced energy storage properties of  $\text{Bi}_{0.5}\text{Na}_{0.5}\text{TiO}_3$ -based ceramics via regulating the doping content and sintering temperature, *Ceram. Int.*, 2023, **49**, 32510-32520.

7. H. Li, F. Yang, X. Chen, X. Fan, Z. Sun, P. Li, J. Liu, Y. Zhang and Z. Pan, Temperature stability and energy storage performances of  $\text{Bi}(\text{Li}_{1/3}\text{Hf}_{2/3})\text{O}_3$ -added BNT-based ceramics, *Ceram. Int.*, 2023, **49**, 39559-39567.
8. D. Wang, B. Chu, P. Li, W. Han, Y. Kong, P. Fu, Y. Li, J. Hao and W. Li, Improving the energy storage performance of  $(\text{Bi}_{0.5}\text{Na}_{0.5})\text{TiO}_3$ - $\text{BaTiO}_3$  based ceramics via  $(\text{Sr}_{0.7}\text{Bi}_{0.2})\text{TiO}_3$  modification, *Ceram. Int.*, 2023, **49**, 37486-37493.
9. L. Zhang, M. Zhao, Y. Yang, Y. Li, M. Tang, D. Wang, X. Wei, G. Liu, Y. Yan and L. Jin, Achieving ultrahigh energy density and ultrahigh efficiency simultaneously via characteristic regulation of polar nanoregions, *Chem. Eng. J.*, 2023, **465**, 142862.
10. J. T. Fan, J. X. Wang, G. He, Z. Long and Z. G. Hu, Ultrahigh energy storage performance of a  $0.75\text{Bi}_{0.47}\text{Na}_{0.47}\text{Ba}_{0.06}\text{TiO}_3$ - $0.25\text{CaTi}_{0.8}\text{Sn}_{0.2}\text{O}_3$  ceramic under moderate electric fields, *Inorg. Chem. Front.*, 2023, **10**, 5475-5487.
11. Y. Z. Lin, R. F. Wan, P. Zheng, Z. H. Li, Y. K. Wang, Q. L. Fan, L. Zheng, Y. Zhang and W. F. Bai, Achieving remarkable energy storage performances under low electric field in  $\text{Bi}_{0.5}\text{Na}_{0.5}\text{TiO}_3$ - $\text{SrTiO}_3$ -based relaxor ferroelectric ceramics via a heterostructure doping strategy, *ACS Appl. Electron. Mater.*, 2023, **5**, 4576-4586.
12. M. Chen, Y. Pu, L. Zhang, B. Wang, F. Zhuo, X. Gao and T. Frömling, Reducing applied field in NBT-based high energy-storage ceramics via B-site entropy regulation, *Chem. Eng. J.*, 2023, **474**, 145386.
13. W. Zhu, H. H. Guo, Z. Y. Shen, F. S. Song, W. Q. Luo, Z. M. Wang and Y. M. Li, Boosting dielectric temperature stability in BNBST-based energy storage ceramics by  $\text{Nb}_2\text{O}_5$  modification, *J. Am. Ceram. Soc.*, 2023, **106**, 3633-3642.

14. W. H. Ye, B. Yan, J. X. Ma, Q. He, L. A. An and K. P. Chen, Enhanced energy-storage properties in  $\text{Zr}^{4+}$ -modified  $(\text{Bi}_{0.4}\text{Ba}_{0.2}\text{K}_{0.2}\text{Na}_{0.2})\text{TiO}_3$  high-entropy ceramics, *J. Am. Ceram. Soc.*, 2023, **106**, 6858-6867.
15. J. Jiang, J. Zhang, M. Zhu, N. Zhang, H. Yang and G. Song, Improved energy storage properties in  $\text{NaNbO}_3$  modified  $0.7\text{Bi}_{0.5}\text{Na}_{0.5}\text{TiO}_3$ - $0.3\text{SrTiO}_3$  ceramics under low electric field, *Solid State Commun.*, 2023, **372**, 115311.
16. Q. Wang, B. Xie, Q. Zheng, M. A. Marwat, Z. Liu, P. Mao, S. Jiang and H. Zhang,  $\text{Bi}_{0.5}\text{Na}_{0.5}\text{TiO}_3$ -based relaxor-ferroelectric ceramics for low-electric-field dielectric energy storage via bidirectional optimization strategy, *Chem. Eng. J.*, 2023, **452**, 139422.
17. J. Zuo, H. Yang, J. Chen and C. Li, Highly-reliable dielectric capacitors with excellent comprehensive energy-storage properties using  $\text{Bi}_{0.5}\text{Na}_{0.5}\text{TiO}_3$ -based relaxor ferroelectric ceramics, *J. Eur. Ceram. Soc.*, 2023, **43**, 2452-2459.
18. L. M. Tang, Z. Y. Yu, Z. B. Pan, J. H. Zhao, Z. Q. Fu, X. Q. Chen, H. H. Li, P. Li, J. J. Liu and J. W. Zhai, Giant energy storage density with antiferroelectric-like properties in BNT-based ceramics via phase structure engineering, *Small*, 2023, **19**, 2302346.
19. P. Mao, Y. G. Guo, G. Lu, Q. S. Yan, R. R. Kang, T. Wang, B. Xie, Z. Y. Liu and L. X. Zhang, Synergistic effect of multi-phase and multi-domain structures induced high energy storage performances under low electric fields in  $\text{Na}_{0.5}\text{Bi}_{0.5}\text{TiO}_3$ -based lead-free ceramics, *Chem. Eng. J.*, 2023, **472**, 144973.
20. T. Deng, Z. Liu, T. F. Hu, K. Dai, Z. G. Hu and G. S. Wang, Excellent energy-storage performance in  $\text{Bi}_{0.5}\text{Na}_{0.5}\text{TiO}_3$ -based lead-free composite ceramics via introducing pyrochlore phase  $\text{Sm}_2\text{Ti}_2\text{O}_7$ , *Chem. Eng. J.*, 2023, **465**, 142992.

21. J. Fan, G. He, Z. Cao, Y. Cao, Z. Long and Z. Hu, Ultrahigh energy-storage density of a lead-free  $0.85\text{Bi}_{0.5}\text{Na}_{0.5}\text{TiO}_3\text{-}0.15\text{Ca}(\text{Nb}_{0.5}\text{Al}_{0.5})\text{O}_3$  ceramic under low electric fields, *Inorg. Chem. Front.*, 2023, **10**, 1561-1573.
22. X. Zhou, G. Xue, Y. Su, H. Luo, Y. Zhang, D. Wang and D. Zhang, Optimized dielectric energy storage performance in ZnO-modified  $\text{Bi}_{0.5}\text{Na}_{0.5}\text{TiO}_3\text{-Sr}_{0.7}\text{Bi}_{0.2}\square_{0.1}\text{TiO}_3$  ceramics with composite structure and element segregation, *Chem. Eng. J.*, 2023, **458**, 141449.
23. M. Wang, T. Bai, A. He, Z. Pan, J. Zhao, L. Tang, Z. Zhao, J. Liu, S. Li and W. Xia, Excellent thermal stability and high energy storage performances of BNT-based ceramics via phase-structure engineering, *J. Materiomics*, 2023, **9**, 1015-1023.
24. C. Y. Li, J. K. Liu, L. Lin, W. F. Bai, S. T. Wu, P. Zheng, J. J. Zhang and J. W. Zhai, Superior energy storage capability and stability in lead-free relaxors for dielectric capacitors utilizing nanoscale polarization heterogeneous regions, *Small*, 2023, **19**, 2206662.
25. J. N. Liu, D. Li, W. C. Zhao, D. M. Xu, Z. Q. Shi, W. F. Liu, J. Z. Su, T. Zhou, G. H. Chen and D. Zhou, Excellent energy storage performance achieved in  $\text{Sr}(\text{Sc}_{0.5}\text{Nb}_{0.5})\text{O}_3$ -doped  $\text{Bi}_{0.5}\text{Na}_{0.5}\text{TiO}_3$ -Based Lead-Free Relaxor Ferroelectric Ceramics, *ACS Appl. Energ. Mater.*, 2024, **7**, 2030-2038.
26. C. B. Long, Z. Q. Su, A. W. Xu, H. Huang, L. J. Liu, L. Gu, W. Ren, H. J. Wu and X. D. Ding,  $\text{Bi}_{0.5}\text{Na}_{0.5}\text{TiO}_3$ -based energy storage ceramics with excellent comprehensive performance by constructing dynamic nanoscale domains and high intrinsic breakdown strength, *Nano Energy*, 2024, **124**, 109493.

27. Y. Zhang, Y. H. Shen, L. M. Tang, J. W. Chen and Z. B. Pan, Modulation of oxygen vacancies optimized energy storage density in BNT-based ceramics a defect engineering strategy, *J. Mater. Chem. C*, 2024, **12**, 13343-13352.
28. L. Lin, C. Li, J. Liu, W. Bai, W. Li and J. Zhai, Boosting capacitive performance of lead-free relaxor ferroelectrics by introducing a linear dielectric, *Ceram. Int.*, 2024, **50**, 829-837.
29. X. Meng, Y. Yuan, H. Wang, B. Tang and E. Li, Superior energy-storage performances under a moderate electric field achieved in antiferroelectric-like  $\text{Na}_{0.5}\text{Bi}_{0.5}\text{TiO}_3$ -based relaxor ferroelectric ceramics by a synergistic optimization strategy, *ACS Appl. Mater. Interfaces*, 2024, **16**, 67979-67994.
30. Y. Ning, Y. Pu, Z. Chen, Z. Sun, L. Zhang, Q. Zhang and C. Wu, High energy storage performance under low electric fields and remarkable dielectric temperature stability in  $(\text{Na}_{0.5}\text{Bi}_{0.5})\text{TiO}_3$ -based lead-free ceramics, *Solid State Sci.*, 2024, **154**, 107616.
31. X. H. Li, C. Q. Zhu, S. H. Li, A. Y. Li, L. Q. Liang, Z. M. Cai and P. Z. Feng, Enhancing energy storage density of BNT-ST-based ceramics by a stepwise optimization strategy on the breakdown strength, *J. Eur. Ceram. Soc.*, 2024, **44**, 6422-6429.
32. Z. M. Chen, Y. P. Pu, Y. T. Ning, C. H. Wu, L. Zhang and X. Q. Zhang, B-site entropy tuning assisted  $\text{Na}_{0.5}\text{Bi}_{0.5}\text{TiO}_3$ -based ceramics with superior energy storage performance, *J. Energy Storage*, 2024, **89**, 111635.
33. M. Qi, H. Feng, M. He, F. Chen, Y. He, Q. Li, L. Yang, Y. Zheng, D. Meng, X. Zhao, Y. Yan, L. Zhang, L. Jin, C. Song and G. Liu, Enhanced energy storage performance in Pb-free  $\text{Na}_{0.5}\text{Bi}_{0.5}\text{TiO}_3$ - $\text{Sr}_{0.7}\text{Bi}_{0.2}\text{TiO}_3$ -based relaxor ferroelectric ceramics through a stepwise optimization strategy, *Ceram. Int.*, 2024, **50**, 30051-30060.

34. X. Zhang, F. Zhang, Y. W. Niu, Z. Q. Zhang, X. Q. Lei and Z. J. Wang, Excellent energy storage performance of perovskite high-entropy oxide-modified  $(\text{Bi}_{0.5}\text{Na}_{0.5})\text{TiO}_3$ -based ceramics, *ACS Appl. Electron. Mater.*, 2024, **6**, 4698-4708.
35. Q. Y. Zheng, B. Xie, Q. Wang, F. Xue, K. Guo, Z. Y. Liu, P. Mao, W. W. Cao, H. J. Luo and H. B. Zhang, Remarkable energy storage properties in  $(\text{Bi}_{0.5}\text{Na}_{0.5})\text{TiO}_3$ -based quasilinear relaxor ferroelectrics via superparaelectric regulation, *Chem. Eng. J.*, 2024, **483**, 149154.
36. Q. Zheng, B. Xie, Y. Tian, Q. Wang, H. Luo, Z. Liu and H. Zhang, High recoverable energy density of  $\text{Na}_{0.5}\text{Bi}_{0.5}\text{TiO}_3$ -based ceramics by multi-scale insulation regulation and relaxor optimization strategy, *J. Materiomics*, 2024, **10**, 845-856.
37. Y. W. Niu, F. Zhang, Z. Q. Zhang, X. Zhang and Z. J. Wang, High energy storage properties achieved in  $0.94(\text{Bi}_{0.5}\text{Na}_{0.5})\text{TiO}_3$ - $0.06\text{BaTiO}_3$  based relaxor ferroelectric ceramics via high-entropy design, *Ceram. Int.*, 2024, **50**, 22662-22670.
38. T. Li, X. Yang, Q. Cheng, A. Xie, X. Jiang, C. Zhou, Y. Zhang and R. Zuo, Achieving high energy-storage performance of medium-entropy  $(\text{Na}_{0.25}\text{Bi}_{0.25}\text{Ca}_{0.25}\text{Sr}_{0.25})\text{TiO}_3$  lead-free relaxor ferroelectric ceramic for pulsed power capacitor, *J. Alloys Compd.*, 2024, **970**, 172524.
39. X. L. Miao, R. Jing, Z. H. Zhang, X. B. Zhang, S. B. Zhang, P. F. Li, C. A. Wang, C. M. Leung, X. S. Gao and M. Zeng, Achieved excellent energy storage performance under moderate electric field in  $\text{BaTiO}_3$ -modified  $\text{Bi}_{0.5}\text{Na}_{0.5}\text{TiO}_3$ -based lead-free ceramics via multiple synergistic design, *J. Mater. Chem. C*, 2024, **13**, 125-136.
40. P. Gao, X. Y. Huang, C. Liu, R. J. Zhang, H. J. Wang, W. J. Geng, Z. X. Sun, Z. H. Liu, X. C. Ren and Y. P. Pu, Enhanced energy-storage properties in  $(\text{Bi}_{0.5}\text{Na}_{0.5})\text{TiO}_3$  ceramics by

- doping linear perovskite materials  $\text{Ca}_{0.85}\text{Bi}_{0.1}(\text{Sn}_{0.5}\text{Ti}_{0.5})\text{O}_3$ , *Chem. Eng. J.*, 2024, **488**, 151070.
41. J. W. Lin, T. Y. Liu, D. D. Meng, Q. He, W. H. Ye, J. X. Ma and K. P. Chen, Enhanced low-field energy storage performance in  $\text{Nd}^{3+}$ -doped  $(\text{Bi}_{0.40}\text{K}_{0.2}\text{Na}_{0.2}\text{Sr}_{0.2})\text{TiO}_3$  high-entropy ceramics, *J. Am. Ceram. Soc.*, 2025, **108**, 1-10.
  42. D.-X. Li, W. Deng, Z.-Y. Shen, Z. Li, X. Zeng, X. Shi, Y. Zhang, W. Luo, F. Song and C.-F. Wu, Aliovalent Sm-doping enables BNT-based relaxor ferroelectric ceramics with > 90% energy efficiency, *J. Adv. Ceram.*, 2024, **13**, 2043-2050.
  43. A. K. Yadav, I. R. Yoo, S. H. Choi, J. Y. Park, M. S. Kim, J. Cho, H. C. Song and K. H. Cho, Enhanced energy storage and temperature-stable dielectric properties in  $(1-x)[(\text{Na}_{0.4}\text{K}_{0.1}\text{Bi}_{0.5})_{0.94}\text{Ba}_{0.06}\text{TiO}_3]-x\text{La}_{0.2}\text{Sr}_{0.7}\text{TiO}_3$  lead-free relaxor ceramics, *J. Alloys Compd.*, 2024, **985**, 174016.
  44. Y. T. Zhang, X. H. Zhang, P. Zhang, Y. Q. Zhang, P. Shi and Z. X. Yue, Domain engineered lead-free  $\text{Bi}_{0.5}\text{Na}_{0.5}\text{TiO}_3\text{-Bi}(\text{Ni}_{0.5}\text{Hf}_{0.5})\text{O}_3$  relaxor ferroelectric ceramics for energy storage with low electric field applications, *J. Energy Storage*, 2024, **84**, 110847.
  45. M. J. Jiang, Z. H. Peng, Y. H. Wang, Q. Z. Chai, D. Wu, P. F. Liang, L. L. Wei, X. L. Chao and Z. P. Yang, Improved energy storage performance of  $\text{Bi}_{0.5}\text{Na}_{0.5}\text{TiO}_3$ -based ceramics via delaying polarization saturation and inducing multi-domain structure, *J. Power Sources*, 2024, **611**, 234693.
  46. Z.-F. Zhang, Y. Zhang, H.-R. Bai, P. Li, H.-H. Huang, Z.-L. Li, M. K. Joshi, W. Li, J.-G. Hao, J. Du and P. Fu, Excellent energy storage properties and multi-scale regulation

- mechanism of  $\text{Sr}(\text{Zr}_{0.5}\text{Ti}_{0.5})\text{O}_3\text{-(Na}_{0.5}\text{Bi}_{0.5})_{0.94}\text{Ba}_{0.06}\text{TiO}_3$  ceramics, *J. Energy Storage*, 2024, **90**, 111711.
47. Q. Y. Long, C. Y. Zuo, S. H. Xiao, F. Du, L. Chen and X. H. Wei, Superior dielectric energy storage performance of ultrafine-grained BNT-SBT solid-solution ceramics by solution combustion synthesis, *Ceram. Int.*, 2024, **50**, 36765-36772.
48. X. Duan, J. Wang, Q. Chai, P. Ma, H. Du, L. Jin, F. Lai, Z. Peng, X. Chao and J. Lu, Enhanced energy storage and cycling stability of  $(\text{Sr}_{0.7}\text{La}_{0.2})(\text{Mg}_{1/3}\text{Nb}_{2/3})\text{O}_3$ -modified  $\text{K}_{0.5}\text{Na}_{0.5}\text{NbO}_3$  ceramics via multiple synergistic strategies, *Ceram. Int.*, 2024, **50**, 18797-18805.
49. Y. Pan, Q. P. Dong, D. F. Zeng, P. Nong, M. Z. Xu, H. F. Zhou, X. Li and X. L. Chen, Enhanced energy storage performance of  $\text{NaNbO}_3$ -based ceramics by constructing weakly coupled relaxor behavior, *J. Energy Storage*, 2024, **82**, 110597.
50. K. Wei, J. H. Duan, G. S. Li, H. F. Yu, H. Qi and H. Li, Novel  $\text{NaNbO}_3$ -based relaxors featuring ultrahigh energy storage performance, *J. Alloys Compd.*, 2024, **994**, 174710.
51. T. T. Gao, Q. F. Chen, X. Li, R. Lang, Z. Tan, Q. Y. Li, Z. X. Tang, J. Xing and J. G. Zhu, Ultrafast charge-discharge and enhanced energy storage properties of lead-free  $\text{K}_{0.5}\text{Na}_{0.5}\text{NbO}_3$ -based ceramics, *J. Am. Ceram. Soc.*, 2024, **107**, 4109-4121.
52. L. R. Yuan, S. Fu, H. Hao, X. Y. Meng, M. H. Cao, Z. H. Yao and H. X. Liu, Ultrafast discharge properties and enhanced energy density in lead-free  $\text{NaNbO}_3$ -based relaxor ferroelectric ceramics, *J. Am. Ceram. Soc.*, 2024, **107**, 5446-5455.

53. L. Wu, Y. Huan, C. Li, F. Jiang and T. Wei, Achieving ultrabroad temperature stability range with high dielectric constant and superior energy storage density in KNN-based ceramic capacitors, *Ceram. Int.*, 2023, **49**, 22015-22021.
54. Q. Dong, P. Nong, Y. Pan, D. Zeng, M. Xu, H. Zhou, X. Li and X. Chen, Energy storage performance of NaNbO<sub>3</sub> lead-free dielectric ceramics by doping Sr(Mg<sub>1/3</sub>Sb<sub>2/3</sub>)O<sub>3</sub>, *J. Mater. Chem. C*, 2023, **11**, 13120-13128.
55. C. Liang, C. Y. Wang, H. Y. Zhao, W. J. Cao, X. C. Huang and C. C. Wang, Enhanced energy storage performance of NaNbO<sub>3</sub>-based ceramics via band and domain engineering, *Ceram. Int.*, 2023, **49**, 40326-40335.
56. Q. Dong, D. Zeng, Y. Pan, P. Nong, X. Chen, X. Li and H. Zhou, Mechanism and simulation analysis of high electric field of NaNbO<sub>3</sub>-based energy storage ceramics based on defect engineering design, *Chem. Eng. J.*, 2024, **493**, 152786.
57. G. Luo, A. Li, Y. Zhang, G. Zhang, Y. Sun, R. Tu and Q. Shen, Improvement of energy storage properties of NaNbO<sub>3</sub>-based ceramics through the cooperation of relaxation and oxygen vacancy defects, *Ceram. Int.*, 2023, **49**, 801-807.
58. N. Zhang, J. R. Jiang, J. X. Zhang, J. Y. Wang, P. P. Jia, M. M. Zhu, Y. Y. Guo, S. Zhou and G. L. Song, High energy storage density in AgNbO<sub>3</sub>-based lead-free antiferroelectrics using A/B-site co-doping strategy, *Appl. Phys. Lett.*, 2024, **124**, 173901.
59. Y. Tian, L. Li, Y. Xu, M. Ma, C. Chen, Z. Sun, L. She, G. Chen, T. Wang, W. Ge, X. Wei and L. Jin, High energy density in Ag<sub>0.5</sub>Na<sub>0.5</sub>(Nb<sub>1-x</sub>Ta<sub>x</sub>)O<sub>3</sub> antiferroelectric ceramics, *J. Eur. Ceram. Soc.*, 2024, **44**, 6967-6977.

60. A. You, Y. Chen, J. Fang, Y. Ding, T. Wang, M. Chen and X. Wang, Enhanced energy storage performance of silver niobate-based antiferroelectric ceramics by two-step sintering method, *J. Mater. Sci.: Mater. Electron.*, 2024, **35**, 649.
61. P. Shi, J. Liu, Y. Song, W. Wu, L. Liu, X. Zhou, X. Chen, X. Lou and P. Liu, Enhanced energy storage properties of silver niobate antiferroelectric ceramics with A-site  $\text{Eu}^{3+}$  substitution and their structural origin, *J. Appl. Phys.*, 2024, **135**, 124103.
62. Z. Zheng, Y. Yang, L. Zhao, K. Zhu, H. Yang and J. Wang, Enhanced relaxation and energy storage performance in  $(\text{Bi}_{0.2}\text{Sr}_{0.7})\text{TiO}_3$  modified  $\text{AgNbO}_3$  ceramics, *Ceram. Int.*, 2024, **50**, 3902-3911.
63. S. Gao, Y. Huang, Y. Jiang, M. Shen, H. Huang, S. Jiang, Y. He and Q. Zhang, Ultrahigh energy density and excellent discharge properties in  $\text{Ce}^{4+}$  and  $\text{Ta}^{5+}$  co-modified  $\text{AgNbO}_3$  relaxor antiferroelectric ceramics via multiple design strategies, *Acta Mater.*, 2023, **246**, 118730.
64. B. Li, Z. Yan, X. Zhou, H. Qi, V. Koval, X. Luo, H. Luo, H. Yan and D. Zhang, Achieving ultrahigh energy storage density of La and Ta codoped  $\text{AgNbO}_3$  ceramics by optimizing the field-induced phase transitions, *ACS Appl. Mater. Interfaces*, 2023, **15**, 4246-4256.
65. Y. Lin, Q. Zhuang and F. Li, Effect of A/B-site structural heterogeneity on ferroelectricity in  $\text{AgNbO}_3$ -based ceramics, *Appl. Phys. Lett.*, 2023, **122**, 143905.
66. L. Ma, Z. Che, C. Xu, Z. Cen, Q. Feng, X. Chen, F. Toyohisa, J.-F. Li, S. Zhang and N. Luo, High energy storage density and efficiency in  $\text{AgNbO}_3$  based relaxor antiferroelectrics with reduced silver content, *J. Eur. Ceram. Soc.*, 2023, **43**, 3228-3235.

67. H. Y. Wang, R. Z. Xue, X. Zhu, M. X. Ning and H. D. Liu, Enhanced energy storage performance in samarium and hafnium co-doped silver niobate ceramics, *Ceram. Int.*, 2023, **49**, 33156-33167.
68. W. Cao, T. Li, C. Liang and C. Wang, Design of high energy-storage properties in eco-friendly AgNbO<sub>3</sub>-based ceramics via two-step sintering method and tuning phase boundary, *J. Mater. Sci.*, 2022, **57**, 21000-21008.
69. L. Ma, Z. Chen, Z. Che, Q. Feng, Z. Cen, F. Toyohisa, Y. Wei, C. Hu, L. Liu and N. Luo, Structure and energy storage performance of lanthanide elements doped AgNbO<sub>3</sub> lead-free antiferroelectric ceramics, *J. Eur. Ceram. Soc.*, 2022, **42**, 2204-2211.
70. J. Wu, T. Zhang, H. Zhao, P. Han, N. Sun, J. Du, L. Zhang, Y. Zhao, Y. Li and X. Hao, Enhanced energy-storage performances in lead-free ceramics via the Co-modulation by conduction effect and domain engineering, *Ceram. Int.*, 2024, **50**, 14637-14644.
71. R. Montecillo, C. Y. Chen, R. F. G. Sinajon, Y. T. Lee, R. Chien, K. C. Feng, P. Y. Chen, C. S. Chen and C. S. Tu, Optimizing energy storage under low electric field in A-site dysprosium modified BiFeO<sub>3</sub>-BaTiO<sub>3</sub> ceramics, *J. Alloys Compd.*, 2024, **983**, 173918.
72. L. T. Xie, X. X. Zhou, Y. C. Tang, Y. Yin, Y. J. Hao, J. Pei and B. P. Zhang, Relaxation behavior of BF-BT based ceramics and improved energy storage performance under low electric field, *J. Mater. Sci.: Mater. Electron.*, 2024, **35**, 483.
73. J. Zhang, Y. Pu, Y. Hao, L. Zhang, B. Wang, Y. Ning and M. Chen, Antiferroelectric-like BiFeO<sub>3</sub>-SrTiO<sub>3</sub> based ceramics with high breakdown strength and energy-storage density, *J. Alloys Compd.*, 2023, **968**, 172147.

74. C. Wu, X. Qiu, W. Ge, L. Chen, C. Liu, H. Zhao, Z. Liu, L. Li and J. G. Fisher, A co-doping strategy to achieve high energy storage performance in BiFeO<sub>3</sub>-based ceramics, *Ceram. Int.*, 2023, **49**, 29218-29228.
75. S. Liu, W. Feng, J. Li, B. He, Z. Bao, C. Zhao, X. Luan and Y. Zhong, Obtaining high energy storage performance and thermal stability simultaneously in BiFeO<sub>3</sub>-BaTiO<sub>3</sub>-Bi<sub>2</sub>LaTiNbO<sub>9</sub> lead-free relaxor ferroelectric ceramics, *Ceram. Int.*, 2023, **49**, 11249-11256.
76. J. Zhao, S. Bao, L. Tang, Y. Shen, Z. Su, F. Yang, J. Liu and Z. Pan, Improved energy storage performances of lead-free BiFeO<sub>3</sub>-based ceramics via doping Sr<sub>0.7</sub>La<sub>0.2</sub>TiO<sub>3</sub>, *J. Alloys Compd.*, 2022, **898**, 162795.
77. S. Liu, W. Feng, J. Li, B. He, M. Liu, Z. Bao, D. Luo and C. Zhao, Realizing excellent energy storage performance and fatigue endurance in Sr<sub>0.7</sub>Sm<sub>0.2</sub>TiO<sub>3</sub> modified 0.67BiFeO<sub>3</sub>-0.33BaTiO<sub>3</sub> lead-free relaxor ceramics, *J. Eur. Ceram. Soc.*, 2022, **42**, 7430-7440.
78. X. Ren, P. Li, P. Fu, J. Du, C. Hu, W. Chao, J. Hao, J. Zhai and W. Li, Achieving high energy storage density and excellent stability in BiScO<sub>3</sub> modified BaTiO<sub>3</sub>-based ceramics, *Ceram. Int.*, 2024, **50**, 8109-8118.
79. S. Yang, D. Zeng, Q. Dong, Y. Pan, P. Nong, M. Xu, X. Chen, X. Li and H. Zhou, Enhancement of energy storage performances in BaTiO<sub>3</sub>-based ceramics via introducing Bi(Mg<sub>2/3</sub>Sb<sub>1/3</sub>)O<sub>3</sub>, *J. Energy Storage*, 2024, **78**, 110102.
80. F. Chen, Y. Zhang, Y. Li, Y. Yan, L. Yang, X. Zeng, T. Deng, H. Nie, G. Liu and L. Zhang, The effects of R<sub>2</sub>O<sub>3</sub> (R=La, Yb, Gd) on the microstructure, dielectric, ferroelectric, and energy storage properties of Ba<sub>0.65</sub>Bi<sub>0.07</sub>Sr<sub>0.245</sub>TiO<sub>3</sub> relaxor ferroelectric ceramics, *Ceram. Int.*, 2023, **49**, 2626-2637.

81. Y. Zhang, G. R. Zhang, A. Li, J. H. Zhang, Y. Q. Zheng, G. Q. Luo, R. Tu, J. Zhang, Q. Shen and L. M. Zhang, Enhancement of energy storage performance in lead-free relaxor ferroelectric ceramics via band structure engineering, *J. Am. Ceram. Soc.*, 2023, **106**, 6630-6640.
82. D. Qie, Z. H. Tang, J. L. Fang, D. J. Yao, L. Zhang, Y. P. Jiang, Q. J. Sun, D. Zhang, J. M. Fan, X. G. Tang, Q. X. Liu and Y. C. Zhou, Excellent energy storage properties, domain mechanism, and temperature stability of lead-free  $\text{BaTiO}_3\text{-Bi}(\text{Mg}_{1/2}\text{Sn}_{1/2})\text{O}_3$  bulk ferroelectrics, *Appl. Phys. Lett.*, 2023, **122**, 172901.
83. M. U. Rehman, A. Manan, M. A. Khan, M. Uzair, I. Qazi, Y. Iqbal, A. Ullah and A. S. Ahmad, Improved energy storage performance of  $\text{Bi}(\text{Mg}_{0.5}\text{Ti}_{0.5})\text{O}_3$  modified  $\text{Ba}_{0.55}\text{Sr}_{0.45}\text{TiO}_3$  lead-free ceramics for pulsed power capacitors, *J. Eur. Ceram. Soc.*, 2023, **43**, 2426-2441.
84. G. Luo, G. Zhang, Y. Zhang, A. Li, Y. Sun, R. Tu and Q. Shen, Wide temperature range of stable dielectric properties in relaxor  $\text{BaTiO}_3$ -based ceramics by co-doping synergistic engineering, *Mater. Chem. Phys.*, 2023, **302**, 127629.
85. Q. Huang, F. Si and B. Tang, The effect of rare-earth oxides on the energy storage performances in  $\text{BaTiO}_3$  based ceramics, *Ceram. Int.*, 2022, **48**, 17359-17368.
86. K. Zhang, P. Zheng, H. Zhang, Z. Niu, C. Luo, W. Bai, J. Zhang, L. Zheng and Y. Zhang, Excellent energy storage performance of paraelectric  $\text{Ba}_{0.4}\text{Sr}_{0.6}\text{TiO}_3$  based ceramics through induction of polar nano-regions, *Ceram. Int.*, 2022, **48**, 19864-19873.

87. S. Zhou, Y. Pu, X. Zhang, Y. Shi, Z. Gao, Y. Feng, G. Shen, X. Wang and D. Wang, High energy density, temperature stable lead-free ceramics by introducing high entropy perovskite oxide, *Chem. Eng. J.*, 2022, **427**, 131684.
88. Y. Zhang, A. Li, G. R. Zhang, Y. Q. Zheng, A. J. Zheng, G. Q. Luo, R. Tu, Y. Sun, J. Zhang and Q. Shen, Optimization of energy storage properties in lead-free barium titanate-based ceramics B-site defect dipole engineering, *ACS Sustainable Chem. Eng.*, 2022, **10**, 2930-2937.
89. D. Han, C. Wang, Z. Zeng, X. Wei, P. Wang, Q. Liu, D. Wang and F. Meng, Ultrahigh energy efficiency of  $(1-x)\text{Ba}_{0.85}\text{Ca}_{0.15}\text{Zr}_{0.1}\text{Ti}_{0.9}\text{O}_3\text{-xBi}(\text{Mg}_{0.5}\text{Sn}_{0.5})\text{O}_3$  lead-free ceramics, *J. Alloys Compd.*, 2022, **902**, 163721.
90. R. Chen, Y. Wang, W. Zhao, Y. Chen, L. Zhao and B. Cui, Improved energy storage density of  $\text{Sr}_{0.7}\text{Bi}_{0.2}\text{TiO}_3$ -based relaxor ferroelectric ceramics via a core-shell-structural optimization strategy, *J. Mater. Sci.: Mater. Electron.*, 2024, **35**, 916.
91. P. Zheng, J. Liu, J. Wang, L. Sheng, X. Zheng, J. Zhou, Y. Zhang, Q. Fan, L. Zheng, W. Bai and Y. Zhang, Enhanced breakdown strength and relevant mechanism of 0-3 type  $\text{Sr}_{0.7}\text{Bi}_{0.2}\text{TiO}_3\text{: Al}_2\text{O}_3$  composite ceramic with remarkable energy storage performances, *J. Alloys Compd.*, 2024, **992**.
92. J. Chen, P. Zhao, F. Si, Y. Li, S. Zhang, Z. Fang and B. Tang, Optimizing electrical performance of low hysteresis  $\text{Sr}_{0.7}\text{Bi}_{0.2}\text{TiO}_3$  energy storage ceramic, *Ceram. Int.*, 2024, **50**, 13208-13218.

93. Y. Li, M. Zeng, F. Tan and J. Liu, Enhanced breakdown strength and excellent energy storage stability by B site hetero-valent doping in  $\text{Sr}_{0.7}\text{Bi}_{0.2}\text{TiO}_3$ -based lead-free ceramic, *J. Alloys Compd.*, 2023, **947**, 169504.
94. S. Yang, C. Zuo, F. Du, L. Chen, W. Jie and X. Wei, Submicron  $\text{Sr}_{0.7}\text{Bi}_{0.2}\text{TiO}_3$  dielectric ceramics for energy storage via a two-step method aided by cold sintering process, *Mater. Design*, 2023, **225**, 111447.
95. L. Liu, B. Chu, P. Li, P. Fu, J. Du, J. Hao, W. Li and H. Zeng, Achieving high energy storage performance and ultrafast discharge speed in  $\text{SrTiO}_3$ -based ceramics via a synergistic effect of chemical modification and defect chemistry, *Chem. Eng. J.*, 2022, **429**, 132548.
96. Y. Ding, P. Li, J. He, W. Que, W. Bai, P. Zheng, J. Zhang and J. Zhai, Simultaneously achieving high energy-storage efficiency and density in Bi-modified  $\text{SrTiO}_3$ -based relaxor ferroelectrics by ion selective engineering, *Composites Part B: Engineering*, 2022, **230**, 109493.
